## 1 Genetic and chemotherapeutic causes of germline hypermutation

2

3 **Authors:** Joanna Kaplanis<sup>1</sup>, Benjamin Ide<sup>2</sup>, Rashesh Sanghvi<sup>1</sup>, Matthew Neville<sup>1</sup>, Petr  
4 Danecek<sup>1</sup>, Tim Coorens<sup>1</sup>, Elena Prigmore<sup>1</sup>, Patrick Short<sup>1</sup>, Giuseppe Gallone<sup>1</sup>, Jeremy  
5 McRae<sup>1</sup>, Chris Odhams<sup>3</sup>, Loukas Moutsianas<sup>3</sup>, Genomics England Research Consortium,  
6 Jenny Carmichael<sup>4</sup>, Angela Barnicoat<sup>5</sup>, Helen Firth<sup>1,4</sup>, Patrick O'Brien<sup>2</sup>, Raheleh Rahbari<sup>1</sup>,  
7 Matthew Hurles<sup>1</sup>

### 8 **Affiliations:**

9 <sup>1</sup> Wellcome Sanger Institute, Wellcome Genome Campus, Hinxton, UK

10 <sup>2</sup> Department of Biological Chemistry, University of Michigan, Ann Arbor, Michigan USA

11 <sup>3</sup> Genomics England, London, UK

12 <sup>4</sup> East Anglian Medical Genetics Service, Cambridge University Hospitals, Cambridge, UK

13 <sup>5</sup> North East Thames Regional Genetics Service, Great Ormond Street Hospital, London, UK

14

### 15 **Summary:**

16 Mutation in the germline is the source of all evolutionary genetic variation and a cause of  
17 genetic disease. Previous studies have shown parental age to be the primary determinant of  
18 the number of new germline mutations seen in an individual's genome. Here we analysed  
19 the genome-wide sequences of 21,879 families with rare genetic diseases and identified 12  
20 hypermutated individuals with between two and seven times more *de novo* single nucleotide  
21 variants (dnSNVs) than expected. In most of these families (8/12) the excess mutations  
22 could be attributed to the father. We determined that two of these families had genetic  
23 drivers of germline hypermutation, with the fathers carrying damaging genetic variation in  
24 known DNA repair genes, causing distinctive mutational signatures. For five families, by  
25 analysing clinical records and mutational signatures, we determined that paternal exposure  
26 to chemotherapeutic agents prior to conception was a key driver of hypermutation. Our  
27 results suggest that the germline is well protected from mutagenic effects, hypermutation is  
28 rare and relatively modest in degree and that most hypermutated individuals will not have a  
29 genetic disease.

## 30 Introduction

31 Germline mutagenesis is the source of all genetic variation which drives evolution and  
32 generates disease-causing variants. The average number of *de novo* mutations (DNMs)  
33 generating single nucleotide variants (SNVs) is estimated to be 60-70 per human genome  
34 per generation, but little is known about germline hypermutated individuals with unusually  
35 large numbers of DNMs<sup>1-3</sup>. The human germline mutation rate is not a constant, but varies  
36 between individuals, families and populations and has evolved over time just like any other  
37 phenotype<sup>45-8</sup>. Parental age explains a large proportion of variance for single nucleotide  
38 variants (SNVs), indels and short tandem repeats (STRs)<sup>3,9,10</sup> It has been estimated that  
39 there is an increase of ~2 DNMs for every additional year in father's age and a more subtle  
40 increase of ~0.5 DNMs for every additional year in mother's age<sup>3,11</sup>. Subtle differences have  
41 also been observed between the maternal and paternal mutational spectra and may be  
42 indicative of different mutagenic processes<sup>12-15</sup>. Different mutational mechanisms can leave  
43 distinct mutational patterns. These combinations of mutation types can be decomposed from  
44 mutational spectra into 'mutational signatures'<sup>16,17</sup>. There are currently >100 somatic  
45 mutational signatures that have been identified across a wide variety of cancers of which half  
46 have been attributed to endogenous mutagenic processes or specific mutagens<sup>18,19</sup>. The  
47 majority of germline mutation can be explained by two of these signatures, termed signature

48 1 (SBS1), likely due to deamination of 5-methylcytosine<sup>20</sup>, and signature 5 (SBS5), thought  
49 to be a pervasive and relatively clock-like endogenous process. Both signatures are  
50 ubiquitous among normal and cancer cell types<sup>21,22</sup> and have been reported previously in  
51 trio-studies<sup>13</sup>. The impact of environmental mutagens has been well established in the soma  
52 but is not as well understood in the germline<sup>23,24</sup>. Environmental exposures in parents, such  
53 as ionising radiation, can influence the number of mutations transmitted to offspring<sup>25-27</sup>.  
54 Individual mutation rates can also be influenced by genetic background. With regards to  
55 somatic mutation, thousands of inherited germline variants have been shown to increase  
56 cancer risk<sup>28-30</sup>. Many of these variants are in genes encoding components of DNA repair  
57 pathways which, when impaired, lead to an increased number of somatic mutations.  
58 However it is not known whether variants in known somatic mutator genes can influence  
59 germline mutation rates. There are a handful of examples where genetic background has  
60 been shown to impact the germline mutation rate of STRs, minisatellites and translocations,  
61 often in cis, rather than genome-wide<sup>31-34,35</sup>.

62 An elevated germline mutation rate can have a significant impact on the health of  
63 subsequent generations. Increasing germline mutation rate results in an increased risk of  
64 offspring being born with a genetic disorder caused by a DNM<sup>36</sup>. Long-term effects of  
65 mutation rate differences as a result of mutation accumulation have been demonstrated in  
66 mice to have effects on reproduction and survival rates and there may be a similar impact in  
67 humans<sup>37,38</sup>.

68 While we have started to explain the general properties of germline mutations, little is  
69 known about rare outliers with extreme mutation rates. *De novo* mutations are a substantial  
70 cause of rare genetic disorders and cohorts of patients with such disorders are enriched for  
71 DNMs overall and are more likely to include germline hypermutated individuals<sup>11,39</sup>. To this  
72 end we sought to identify germline hypermutated individuals in ~20,000 sequenced parent  
73 offspring trios from two rare disease cohorts. We identified genetic or environmental causes  
74 of this hypermutation and estimated how much variation in germline mutation rate this may  
75 explain.

## 76 Results

### 77 Identifying germline hypermutated individuals in rare disease cohorts

78 We sought to identify germline hypermutated individuals in two separate cohorts: 7,930  
79 exome-sequenced parent offspring trios from the Deciphering Developmental Disorders  
80 (DDD) Study and 13,949 whole-genome sequenced parent offspring trios in the rare disease  
81 arm of the 100,000 Genome Project (100kGP). We selected nine trios from the DDD study  
82 with the largest number of exonic DNMs in the offspring, given their parental ages, which  
83 were subsequently whole genome sequenced at >30X coverage to characterise DNMs  
84 genome-wide. In the 100kGP cohort, we performed extensive filtering of the DNMs which  
85 resulted in a total of 903,525 *de novo* SNVs (dnSNVs) and 72,110 *de novo* indels (dnIndels).  
86 The median number of DNMs per individual was 62 for dnSNVs and 5 for dnIndels (median  
87 paternal and maternal ages of 33 and 30) (Supplemental Figure 1).

88 Parental age explains the majority of variance in numbers of germline mutations  
89 observed in offspring and is important to control for when examining additional sources of  
90 variation<sup>3</sup>. We observed an increase in total number of dnSNVs of 1.28 dnSNVs/year of  
91 paternal age (CI:1.24-1.32,  $p < 10^{-300}$ , Negative binomial regression) and an increase of 0.35  
92 dnSNVs/year of maternal age (CI: 0.30-0.39,  $p = 3.0 \times 10^{-49}$ , Negative Binomial regression)  
93 (Figure 1a). We were able to phase 241,063 dnSNVs and found that 77% of phased DNMs  
94 were paternal in origin, which agrees with previous estimates<sup>12-14</sup>. Estimates of the parental

95 age effect in the phased mutations were not significantly different to the unphased results:  
 96 1.23 paternal dnSNVs/year of paternal age (CI: 1.14-1.32,  $p = 1.6 \times 10^{-158}$ ) and 0.38 maternal  
 97 dnSNVs/year of maternal age (CI: 0.35,0.41,  $p = 6.6 \times 10^{-120}$ ) (Supplemental Figure 2b).  
 98 Paternal and maternal age were also significantly associated with the number of dnIndels:  
 99 an increase of 0.071 dnIndels/year of paternal age (CI: 0.062-0.080,  $p = 8.3 \times 10^{-56}$ ,  
 100 Supplemental Figure 2a) and a smaller increase of 0.019 dnIndels/year of maternal age (CI:  
 101 0.0085-0.029  $p = 3.4 \times 10^{-4}$ , Supplemental Figure 2a). The ratio of paternal to maternal  
 102 mutation increases for SNVs and indels were very similar, 3.7 for SNVs and 3.8 for indels.  
 103 The proportion of *de novo* mutations that phased paternally increased by 0.0017 for every  
 104 year of paternal age ( $p = 3.37 \times 10^{-38}$ , Binomial regression, Supplemental Figure 3).  
 105 However, the effect size is small and the proportion of DNMs that phase paternally in the  
 106 youngest fathers is ~0.75 and so the paternal age effect alone does not fully explain the  
 107 strong paternal bias<sup>14</sup>. We compared the mutational spectra of the phased DNMs and found  
 108 that maternally derived DNMs have a significantly higher proportion of C>T mutations (0.27  
 109 maternal vs 0.22 paternal,  $p = 3.24 \times 10^{-80}$ , Binomial test), while paternally derived DNMs  
 110 have a significantly higher proportion of C>A, T>G and T>C mutations (C>A: 0.08 maternal  
 111 vs 0.10 paternal,  $p = 4.6 \times 10^{-23}$ ; T>G 0.06 vs 0.7,  $p = 6.8 \times 10^{-28}$ ; T>C 0.25 vs 0.26,  $p =$   
 112  $1.6 \times 10^{-5}$ ; Binomial test, Supplemental Figure 4a). These mostly agree with previous studies  
 113 although the difference in T>C mutations was not previously significant<sup>12</sup>. The majority of  
 114 both paternal and maternal mutations could be explained by Signature 1 and 5, with a  
 115 slightly higher contribution of signature 1 in paternal mutations (0.16 paternal vs 0.15  
 116 maternal, chi-squared test  $p = 2.0 \times 10^{-5}$ , Supplemental Figure 4b).

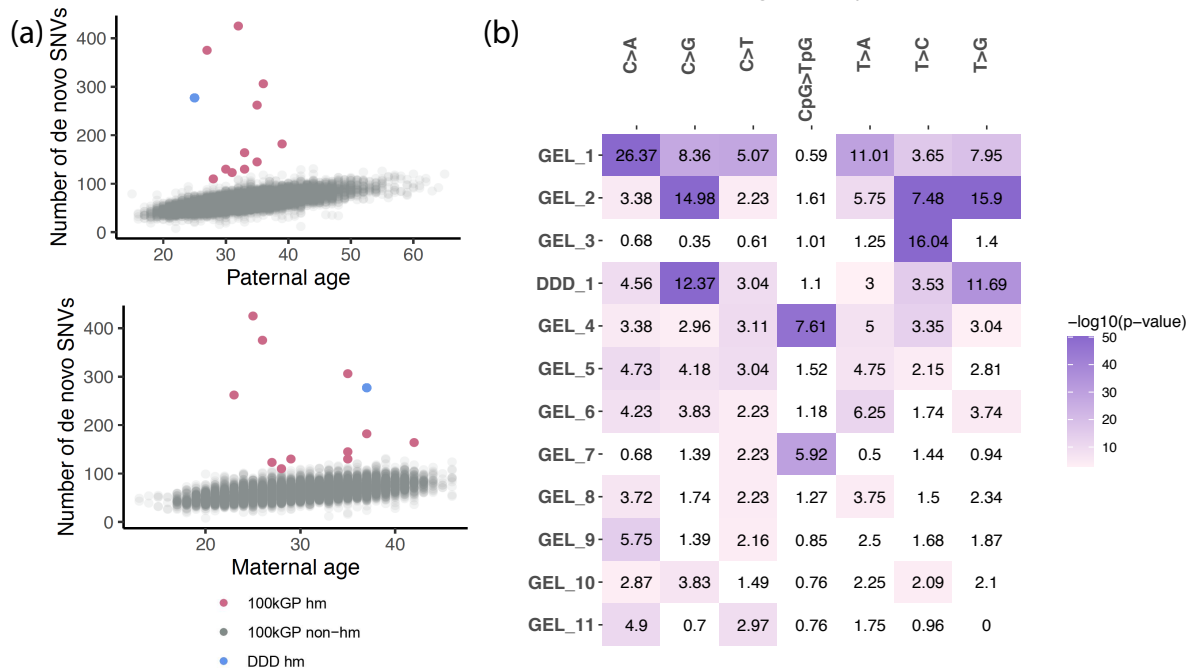

117  
 118 **Figure 1: Identification of germline hypermutated individuals** (a) Paternal and maternal  
 119 age vs number of dnSNVs, 100kGP hypermutated individuals are highlighted in pink and  
 120 DDD hypermutated individual is highlighted in blue (b) Enrichment (observed/expected) of  
 121 mutation type for hypermutated individuals. Sample names on the y-axis, mutation type on  
 122 the x-axis. The enrichment is colored by the  $-\log_{10}(\text{enrichment } p\text{-value})$  which was  
 123 calculated using a Poisson test comparing the average number of mutations in each type  
 124 across all individuals in the 100kGP cohort. White coloring indicates no statistically  
 125 significant enrichment ( $p\text{-value} < 0.05/12*7$ ).

| ID     | Number of dnSNVs/ dnIndels | Child age | Paternal age | Maternal age | SNV p-value | Indel p-value | TS bias | Phase (P,M) | Potential source of hypermutation                                                              |
|--------|----------------------------|-----------|--------------|--------------|-------------|---------------|---------|-------------|------------------------------------------------------------------------------------------------|
| GEL_1  | 425/16                     | 5-10      | 30-35        | 20-25        | 4.2e-90     | 9.4e-05       | 2.1e-40 | 129,1***    | Paternal DNA repair defect; homozygous stop-gain <i>XPC</i> variant                            |
| GEL_2  | 375/5                      | 10-15     | 25-30        | 25-30        | 2.3e-83     | 0.43          | 0.22    | 106,7***    | Paternal chemotherapy; Nephrotic syndrome: Cyclophosphamide, Chlorambucil                      |
| GEL_3  | 306/4                      | 0-5       | 35-40        | 30-35        | 2.5e-44     | 0.73          | 0.86    | 87,5***     | Paternal DNA repair defect; homozygous missense <i>MPG</i> variant                             |
| DDD_1  | 277/6                      | 6         | 25           | 37           | NA          | NA            | 3.3e-03 | 72,4***     | Paternal chemotherapy; Hodgkins Lymphoma: ABVD, IVE                                            |
| GEL_4  | 262/12                     | 10-15     | 30-35        | 20-25        | 1.7e-37     | 0.007         | 0.070   | 36,32***    | Post-zygotic hypermutation                                                                     |
| GEL_5  | 182/8                      | 0-5       | 35-40        | 35-40        | 8.4e-14     | 0.19          | 0.15    | 63,4***     | Paternal chemotherapy; SLE: drugs unknown                                                      |
| GEL_6  | 164/7                      | 0-5       | 30-35        | 40-45        | 9.8e-13     | 0.25          | 0.066   | 38,3*       | Unknown                                                                                        |
| GEL_7  | 145/9                      | 0-5       | 30-35        | 30-35        | 2.4e-09     | 0.08          | 0.02    | 24,16*      | Post-zygotic hypermutation                                                                     |
| GEL_8  | 130/6                      | 20-25     | 25-30        | 25-30        | 2.1e-09     | 0.31          | 1.00    | 31,11       | Paternal chemotherapy; Testicular cancer: drugs unknown                                        |
| GEL_9  | 130/5                      | 5-10      | 30-35        | 30-35        | 1.2e-07     | 0.53          | 0.016   | 46,2**      | Paternal chemotherapy; Testicular cancer: BEP                                                  |
| GEL_10 | 123/5                      | 10-15     | 30-35        | 25-30        | 5.3e-08     | 0.48          | 0.082   | 38,0***     | Unknown                                                                                        |
| GEL_11 | 110/5                      | 10-15     | 25-30        | 25-30        | 8.2e-07     | 0.44          | 6.9e-06 | 28,1*       | Paternal chemotherapy; Cancer of long bones, intestinal tract, lung (secondary): Drugs unknown |

126 **Table 1: Properties and possible hypermutation sources for 12 germline**  
127 **hypermutated individuals.** Eleven individuals were identified in 100kGP as having a  
128 significantly large number of dnSNVs (GEL\_1-GEL\_11) and one individual identified in the  
129 DDD study (DDD\_1). The DNM counts are for autosomal DNMs. Child age refers to age  
130 when sample was taken. Paternal and maternal age refer to age at child's birth. All ages are  
131 given as 5 year ranges for 100kGP individuals and the exact age for the DDD individuals.  
132 SNV and indel p-value is from testing the number of dnSNVs and dnIndels compared to  
133 what we would expect after accounting for parental age. TS bias: transcriptional strand bias  
134 p-value for dnSNVs. Phase (P,M): the number of dnSNVs that phase paternally (P) and  
135 maternally (M) with significance indicator for how different this ratio is compared to the  
136 observed proportion across all DNMs that phase paternally in 100kGP (0.77) using a  
137 Binomial test (\*p<0.1, \*\*p<0.01, \*\*\*p<0.001). We have detailed the parental cancer and  
138 chemotherapy drugs received when relevant. Treatments abbreviations: BEP (Bleomycin,  
139 etoposide and platinum), ABVD (Bleomycin-Dacarbazine-Doxorubicin-Vinblastine) and IVE  
140 (Iphosphamide, epirubicin and etoposide).  
141

142 We identified 12 germline hypermutated individuals after accounting for parental age  
143 (see Methods): 11 from the 100kGP cohort and 1 from the DDD cohort (Figure 1a, Table 1).  
144 The number of DNMs genome-wide for each of the 12 hypermutated individuals ranged from  
145 110-425 dnSNVs, which corresponds to a fold increase of 1.7-6.5 compared to the median  
146 number of dnSNVs per individual across the 100kGP cohort. Two of these individuals also  
147 had a significantly increased number of dnIndels (Table 1). The mutational spectra across  
148 these hypermutated individuals varied dramatically (Figure 1b, Supplemental Figure 5,  
149 Supplemental Table 1) and after extracting mutational signatures we found that while many  
150 of the mutations mapped onto several known somatic signatures (from the Catalogue of  
151 Somatic Mutations in Cancer (COSMIC)<sup>40</sup>), a novel mutational signature, termed SBSHYP,  
152 was also extracted (Figure 2a,b, Supplemental Table 2). In addition to mutational spectra,  
153 we evaluated the parental phase, transcriptional strand bias (Supplemental Figure 6) and the  
154 distribution of the variant allele fraction (VAF) for these mutations (Supplemental Figure 7).  
155 Upon examining these properties, we identified three potential sources of germline  
156 hypermutation: paternal defects in DNA repair genes, paternal exposure to  
157 chemotherapeutics and post-zygotic mutational factors.

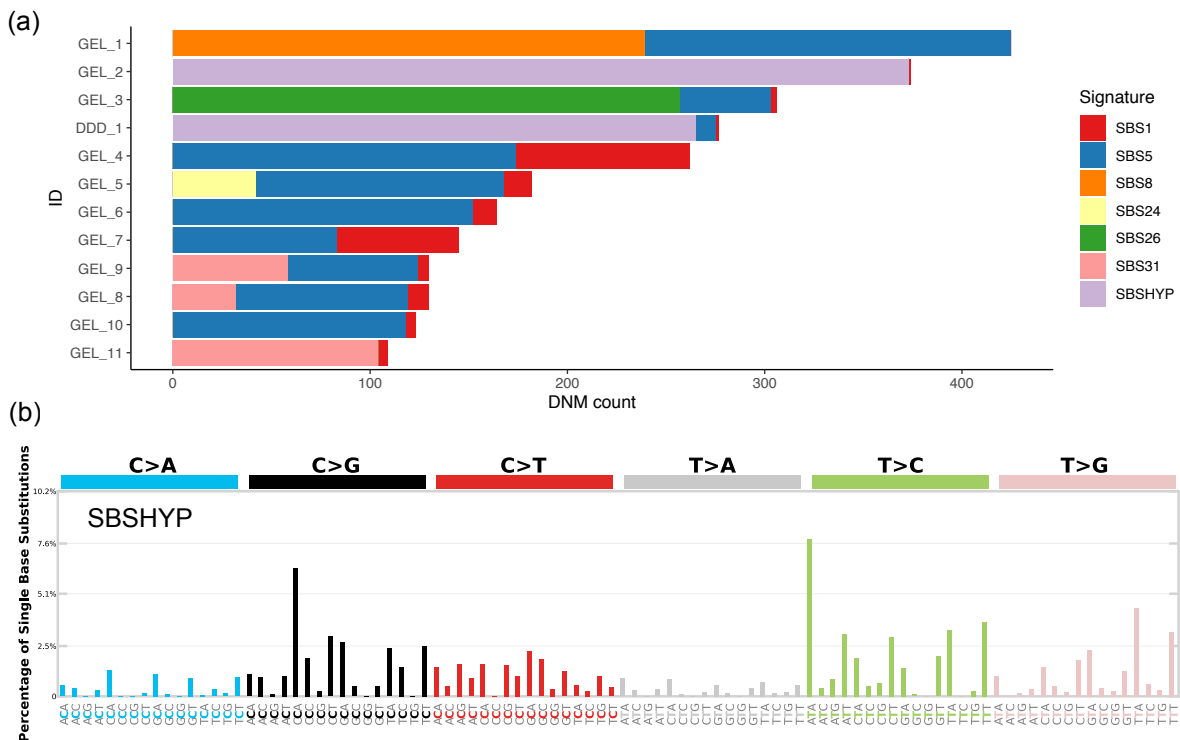

158  
159 **Figure 2: Mutational signatures in 12 germline hypermutated individuals (a)**  
160 Contributions of mutational signatures extracted using SigProfiler and decomposed on to  
161 known somatic mutational signatures as well as the novel signature (SBSHYP) identified in  
162 both DDD\_1 and GEL\_2. Summary of signatures: SBS1 and SBS5 are known germline  
163 signatures; SBS8 associated with TC-NER; SBS26 associated with defective MMR; SBS31  
164 associated with platinum drug treatment; SBS24 is associated with aflatoxin exposure. (b)  
165 Trinucleotide context mutational profile of novel extracted mutational signature SBSHYP  
166

### 167 Paternal defects in DNA repair

168 For eight of the twelve individuals, the DNMs phased paternally significantly more than  
169 expected given the overall ratio of paternal:maternal mutation in the 100kGP cohort  
170 ( $p < 0.05/12$ , Binomial test, Table 1). This implicates the paternal germline as the source of  
171 the hypermutation. Two of these fathers carry rare homozygous nonsynonymous variants in

172 known DNA repair genes (Supplemental Table 3). Defects in DNA repair are known to  
173 increase the mutation rate in the soma and may have a similar effect in the germline. GEL\_1  
174 has the largest number of DNMs of all individuals, a 6.5-fold enrichment, and a significantly  
175 increased number of dnIndels. The mutational spectra demonstrates a high enrichment of  
176 C>A and T>A mutations (Figure 1b) and we observed a large contribution from Somatic  
177 Mutational Signature 8 (Figure 2a). This signature is associated with transcription-coupled  
178 nucleotide excision repair (TC-NER) and typically presents with transcriptional strand bias.  
179 This agrees with the strong transcriptional strand bias observed in GEL\_1 ( $p = 2.1 \times 10^{-40}$ ,  
180 Poisson test, Supplemental Figure 6). The father has a rare homozygous nonsense variant  
181 in the gene *XPC* (Table 1, Supplemental Table 3) which is involved in the early stages of the  
182 nucleotide-excision repair (NER) pathway. The paternal variant is annotated as pathogenic  
183 for xeroderma pigmentosum in ClinVar and clinical follow-up confirmed that the father had  
184 already been diagnosed with this disorder. Patients with xeroderma pigmentosum have a  
185 high risk of developing skin cancer due to their impaired ability to repair UV damage and are  
186 also known to be at a higher risk of developing other cancers<sup>41,42</sup>. *XPC* deficiency has been  
187 associated with a similar mutational spectrum to the one we observe in GEL\_1<sup>43</sup> and *xpc*  
188 deficiency in mice has been shown to increase the germline mutation rate at two STR loci<sup>44</sup>.

189 GEL\_3 has a ~5-fold enrichment of the number of dnSNVs. These dnSNVs exhibit a  
190 very distinct mutational spectrum with a ~17-fold increase in T>C mutations but no  
191 significant enrichment for any other mutation type (Figure 2b, Supplemental Figure 5d).  
192 Extraction of mutational signatures revealed that the majority of mutations mapped onto  
193 Somatic Mutational Signature 26 which has been associated with defective mismatch repair.  
194 The father has a rare homozygous missense variant in the gene *MPG* (Table 1,  
195 Supplemental Table 4). *MPG* encodes N-methylpurine DNA glycosylase (also known as  
196 alkyladenine-DNA glycosylase - AAG) which is involved in the recognition of base lesions,  
197 including alkylated and deaminated purines, and initiation of the base-excision repair (BER)  
198 pathway. The *MPG* variant is rare in gnomAD (allele frequency= $9.8 \times 10^{-5}$ , no observed  
199 homozygotes) and is predicted to be pathogenic by the Combined Annotation Dependent  
200 Depletion (CADD) score (CADD score = 27.9) and the amino acid residue is fully conserved  
201 across 172 aligned protein sequences from VarSite<sup>45,46</sup>. In the context of the protein, the  
202 variant amino-acid forms part of the substrate binding pocket and likely affects substrate  
203 specificity (Figure 3a). *MPG* has not yet been described as a cancer susceptibility gene, but  
204 studies in yeast and mice have demonstrated variants in this gene, and specifically the  
205 substrate binding pocket, can lead to a mutator phenotype<sup>47,48</sup>. We explored the functional  
206 impact of the observed A135T variant using *in vitro* assays (Methods, Supplemental Figures  
207 8, 9). The A135T variant caused a two-fold decrease in excision efficiency of the  
208 deamination product hypoxanthine (Hx) in both the T and C contexts (Figure 3c,  
209 Supplemental Figure 9), with a small increase in excision efficiency of an alkylated adduct  
210 1,N6-ethenoadenine ( $\epsilon$ A) in both the T and C contexts (Figure 3b, Supplemental Figure 9).  
211 The maximal rate of excision is increased by 2-fold for  $\epsilon$ A which is among the largest  
212 increases that have been observed for 15 reported *MPG* variants (Supplemental Table 4).  
213 Another variant, N169S, which also shows an increase in N-glycosidic bond cleavage with  
214 the  $\epsilon$ A substrate has been established as a mutator in yeast<sup>48,49</sup>. These assays confirm that  
215 the A135T substitution alters the *MPG* binding pocket and changes the activity towards  
216 different DNA adducts. *MPG* acts on a wide variety of DNA adducts and further functional  
217 characterisation and mechanistic studies are required to link the observed T>C germline  
218 mutational signature to the aberrant processing of a specific class of DNA adducts.

219 GEL\_6 has 164 dnSNVs and has a larger contribution of paternally phased mutations  
220 than expected (38:3 paternal:maternal,  $p = 0.022$ , Binomial test) however the father does not

221 have any nonsynonymous variants in DNA repair genes nor has undergone any  
222 chemotherapeutic treatment. This unexplained cause of hypermutation could be due to a  
223 paternal variant in a gene currently not associated with DNA repair, a paternal mutator  
224 variant that is only present in the germline and not the blood, or a rare gene-by-environment  
225 interaction.  
226

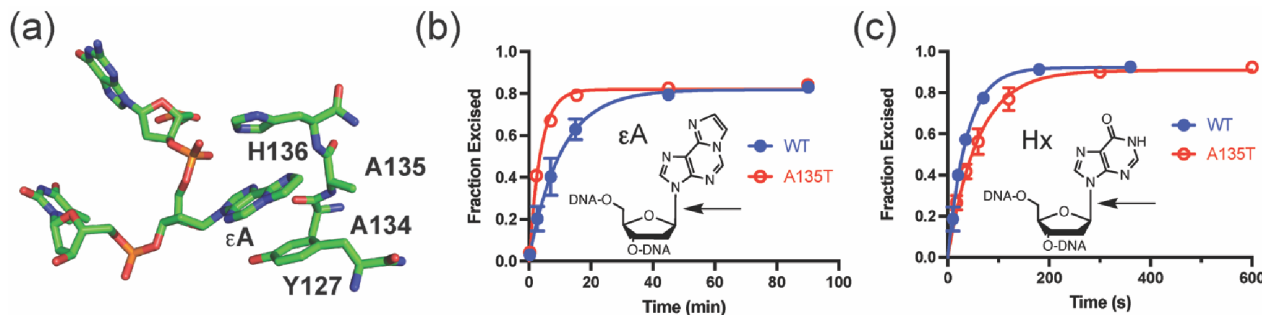

227  
228 **Figure 3. A135T substitution alters the DNA glycosylase activity of MPG.** (a) Active site  
229 view of MPG bound to  $\epsilon$ A-DNA from pdb 1EWN. A135 and H136 form the binding pocket for  
230 the flipped-out base lesion, which is bracketed by Y127 on the opposing face. (b) Single  
231 turnover excision of  $\epsilon$ A from  $\epsilon$ A•T is 2 fold faster for A135T (red) than for WT (blue) MPG. (c)  
232 Single turnover excision of Hx from Hx•T is slower for A135T (red) as compared to WT (blue)  
233 MPG. Arrows indicate the N-glycosidic bond that is cleaved by MPG. Each data point is the  
234 mean  $\pm$  SD (N $\geq$ 3) (see Supplemental Figure 9 for complete kinetic analysis).  
235

### 236 Parental treatment with chemotherapy prior to conception

237 Three hypermutated individuals (GEL\_8, GEL\_9 and GEL\_11) have a contribution from  
238 somatic mutational signature 31 (SBS31) (Figure 2a), which has been associated with  
239 treatment with platinum-based drugs such as cisplatin<sup>16</sup>. The phased dnSNVs in GEL\_9 and  
240 GEL\_11 are paternally biased (46 paternal: 2 maternal,  $p = 0.0014$ ; 28 paternal:1 maternal,  
241  $p = 0.012$ ; Binomial test, Table 1), and the dnSNVs in GEL\_11, which has the largest  
242 contribution of SBS31, exhibit a significant transcriptional strand bias, as expected for this  
243 signature ( $p = 6.9 \times 10^{-6}$ , Table 1, Supplemental Figure 6). All three fathers have a history  
244 of cancer and chemotherapeutic treatment prior to conception as recorded in their available  
245 hospital episode records. The father of GEL\_11 was diagnosed and received  
246 chemotherapeutic treatment for osteosarcoma, lung cancer, and cancer of the intestinal tract  
247 within 5 years prior to conception. Cisplatin is a commonly used chemotherapeutic for  
248 osteosarcoma and lung cancer. Platinum-based drugs damage DNA by causing covalent  
249 adducts. Cisplatin mainly reacts with purine bases, forming intrastrand crosslinks which can  
250 be repaired by NER or bypassed by translesion synthesis which may, in turn, induce single  
251 base substitutions<sup>50</sup>. The fathers of GEL\_8 and GEL\_9 both have a history of testicular  
252 cancer where cisplatin is the most commonly administered chemotherapeutic.

253 GEL\_2 and DDD\_1 have a similar number of dnSNVs, which are significantly  
254 paternally biased (Table 1). The mutational spectra of the DNMs in these individuals are very  
255 similar and share a novel mutational signature (SBSHYP) that is characterised by an  
256 enrichment of C>G and T>G mutations (Figure 2a,b) and does not map on to any previously  
257 described signature observed in somatic mutations (as described in COSMIC) or in  
258 response to mutagenic exposure<sup>24,51,52</sup> (Supplemental Figure 10a). The fathers of these  
259 individuals do not have putative damaging variants in any DNA repair genes and do not  
260 share rare nonsynonymous variants in any other gene. Both fathers received  
261 chemotherapeutic treatment prior to conception including nitrogen mustard alkylating agents  
262 (Supplemental Table 4), although with different members of this class of chemotherapies,

263 therefore we strongly suspect this class of chemotherapies to be the cause of this novel  
264 mutational signature. Experimental studies of a subset of alkylating agents have shown them  
265 to have diverse mutational signatures<sup>24,51,52</sup> (Supplemental Figure 10b).

266 GEL\_5 has 182 dnSNVs and a significant paternal bias in the phased dnSNVs ( $p =$   
267  $5.8 \times 10^{-4}$ , Binomial Test, Table 1). The father of GEL\_5 has a diagnosis of Systemic Lupus  
268 Erythematosus (SLE) and received a course of chemotherapy nine years prior to the  
269 conception of the child however the dnSNVs do not map onto any known chemotherapeutic  
270 mutational signatures (Figure 1b, Figure 2a). There is a contribution of SBS24 which is  
271 associated with aflatoxin exposure in cancer blood samples, however there is no evidence of  
272 exposure in the father's hospital records<sup>22</sup>

273 We assessed how parental cancer and exposure to chemotherapy might impact  
274 germline mutation rate more generally by systematically examining hospital episode  
275 statistics across the 100kGP cohort for ICD10 codes related to cancer and chemotherapy  
276 that were recorded prior to the conception of the child. We identified 27 fathers (0.9%) who  
277 had a history of cancer, 7 of which had testicular cancer (Supplemental Table 6). The  
278 offspring of these 27 fathers did not have a significantly increased number of dnSNVs after  
279 correcting for parental age ( $p = 0.73$ , Wilcox test). This is a small number of fathers so this is  
280 not well powered and it is not known definitively how many of these fathers were treated with  
281 chemotherapy (6 of the 27 had chemotherapy-related ICD10 codes). Treatment exposure  
282 may predate the availability of digitised hospital records and there was limited information on  
283 whether conception may have been achieved using sperm stored prior to treatment. While  
284 the total number of dnSNVs across all the children is not significantly increased, two of the  
285 27 fathers had hypermutated children which is a significant enrichment compared to those  
286 fathers who do not have a recorded history of cancer (2/27 vs 9/2891,  $p = 0.0043$ , Fisher  
287 exact test). This is likely a conservative p-value as we know that two other hypermutated  
288 individuals have fathers who have been treated with chemotherapy however did not fall into  
289 this group due to the filtering criteria as we only considered fathers who had at least one ICD  
290 10 code recorded prior to the child's conception (see Methods). A possible confounder could  
291 be that fathers who had cancer prior to conception are older and may be more likely to have  
292 been exposed to other germline mutagens however these two groups had the same median  
293 paternal age ( $p = 0.77$ , Wilcoxon test).

294 We performed the same analysis across 5,508 mothers in the 100kGP cohort who  
295 had hospital episode records entered prior to the conception of their child and identified 27  
296 mothers (0.5%) who had a history of cancer, 9 of whom also had recorded chemotherapy  
297 codes. Children whose mothers had a history of cancer had a nominally significant increase  
298 of dnSNVs after correcting for parental age and data quality ( $p = 0.03$ , Wilcox Test). Mothers  
299 who had been diagnosed with cancer were significantly older at the birth of the child  
300 compared to those who were not ( $p = 0.003$ , Wilcoxon test). Matching on parental age,  
301 mothers who had a cancer diagnosis prior to conception had a median increase of 9  
302 dnSNVs. Overall there is not an excess of maternally phased DNMs across these individuals  
303 ( $p = 0.44$ , Binomial test) however there is one individual with nominal significance  
304 (MatCancer\_23, 22 paternal:14 maternal,  $p = 0.02$ , Binomial test, Supplemental Table 5).

305 We extracted mutational signatures for all these offspring with a maternal or paternal  
306 history of cancer that were not hypermutated and found that only one individual had unusual  
307 mutational signatures (Supplemental Figure 11). This individual (PatCancer\_10) has a  
308 contribution of mutational signature SBS31 which is associated with treatment with platinum-  
309 based drugs (Supplemental Figure 11). Their father was treated for testicular cancer prior to  
310 conception and the child has 94 dnSNVs ( $p = 0.005$ , SNV p-value after correcting for



311 parental age) of which 89% phased paternally ( $p = 0.12$ , Binomial test, Supplemental Figure  
312 11, Supplemental Table 6).

313

### 314 **Post-zygotic hypermutation**

315 The two hypermutated individuals, GEL\_4 and GEL\_7, have a ~4 fold and ~2 fold increase  
316 in dnSNVs respectively that phase equally between the maternal and paternal  
317 chromosomes. The allele balance of the dnSNVs in these individuals was shifted below 0.5  
318 (Supplemental Figure 7). In both individuals, the proportion of DNMs with variant allele  
319 fraction (VAF)  $< 0.4$  was significantly higher compared to all DNMs across all individuals  
320 (GEL\_4:  $p = 3.9 \times 10^{-59}$ , GEL\_7:  $p = 8.3 \times 10^{-4}$ , Binomial test). These observations indicate  
321 that these mutations most likely occurred post-zygotically and are less likely due to a  
322 parental hypermutator. Both individuals have a large contribution of mutations from Somatic  
323 Mutational Signature 1 (Figure 2a)<sup>40</sup>. The observations in GEL\_4 are likely due to clonal  
324 haematopoiesis leading to a large number of somatic mutations in the child's blood. The  
325 mutational signature associated with haematopoietic stem cells is similar to SBS1 and we  
326 identified a mosaic *de novo* missense mutation in the gene *ETV6*. Mutations in *ETV6* are  
327 associated with Leukemia and Thrombocytopenia<sup>53</sup>. GEL\_4 has several blood related  
328 clinical phenotypes such as abnormality of blood and blood-forming tissues and  
329 myelodysplasia. We do not observe similar phenotypes in GEL\_7, nor did we identify a  
330 possible genetic driver of clonal haematopoiesis, and the child was one year old at  
331 recruitment. For this individual we considered the possibility that a maternal mutator variant  
332 protein may be impacting the mutation rate in the first few cell divisions. We identified a  
333 maternal mosaic missense variant in *TP53* which is annotated as pathogenic in ClinVar for  
334 Li-Fraumeni syndrome which is characterised by a predisposition to cancer however it is  
335 unknown if this variant is also present in the maternal germline and, if present, whether it  
336 would be likely to have a germline mutagenic effect<sup>54</sup>. This variant is not observed in the  
337 child.

338

### 339 **Fraction of germline mutation rate variation explained**

340 We investigated the factors influencing the number of dnSNVs per individual in a subset of  
341 7,700 100kGP trios filtered more stringently for data quality (Methods). Using a negative  
342 binomial model, accounting for the underlying Poisson variation in germline mutation rate,  
343 we estimated that parental age accounts for 69.7% and data quality metrics (eg. read depth,  
344 proportion of mapped reads) explain 1.3% of the variance. The variance explained by  
345 parental age is smaller than a previous estimate of 95% based on a sample of 78 families<sup>3</sup>.  
346 To assess whether this could be due to uncertainty in the previous estimate, we performed  
347 repeated sampling of 78 trios from the 100kGP and refit the model and found that the  
348 estimates of the variance explained by parental age can vary dramatically with this smaller  
349 sample size (median of 79%, 95% interval [52-100%]) and that 7% of our simulations had an  
350 estimate as or more extreme than 95%.

351 We extended this model to account for germline hypermutation by including a  
352 variable for the number of excess dnSNVs in the 11 hypermutated individuals in this cohort.  
353 We found this explained an additional 7.1% of variance. This leaves 21.9% (19.7% , 23.8%,  
354 Bootstrap 95% confidence interval) of variance for numbers of dnSNV per individual  
355 unaccounted for. Both mutagenic exposures and genetic variation in DNA repair genes are  
356 implicated here as causes of hypermutation, therefore they may also play a more subtle role  
357 in the remaining germline mutation rate variation. In addition, polygenic effects and gene by  
358 environment interactions may also contribute.

359 To assess whether rare variants in genes known to be involved in DNA repair  
360 pathways impact germline mutation rate more generally, we looked across the whole  
361 100kGP cohort. We curated three sets of rare nonsynonymous variants that have increasing  
362 likelihoods of impacting germline mutation rate: (i) variants in all DNA repair genes (N=186),  
363 (ii) variants in genes encoding components of the DNA repair pathways most likely to create  
364 SNVs (N=66) and (iii) a subset of these variants that had previously been associated with  
365 cancer (see Methods). We focused primarily on the effect of heterozygous variants (MAF<  
366 0.001). In the first set of genes we also considered the impact of rare homozygous variants  
367 (MAF<0.01) (the counts were too small to assess in the subsequent groups). There was no  
368 statistically significant effect in any of these groups of variants after Bonferroni correction  
369 (Supplemental Figure 12, Supplemental Table 7). We examined heterozygous protein-  
370 truncating variants (PTVs) in the known cancer mutator gene MBD4 which are associated  
371 with a three-fold elevated CpG>TpG mutation rate in tumours. We identified and whole-  
372 genome sequenced 13 paternal carriers of MBD4 PTVs from the DDD cohort. We found that  
373 these individuals did not have a significant increased number of overall DNMs and there was  
374 no significant increase in the number of CpG>TpG mutations ( $p = 0.56$ , chi-squared test,  
375 Supplemental Figure 13). Power modelling suggested there is unlikely to be more than a  
376 22% increase in the CpG mutation rate. This further demonstrates that heterozygous PTVs  
377 in known somatic mutator genes may not always have a similar effect in the germline.

378 To explore the polygenic contribution to germline mutation rate, we estimated the  
379 residual variation in the number of dnSNVs in offspring that was explained by germline  
380 variants after correcting for parental age, data quality and hypermutation status. We  
381 estimated this separately for fathers and mothers in the 100kGP cohort using GREML-LDMS  
382 <sup>55</sup> stratified by minor allele frequency and LD. We found that maternal germline variation  
383 (MAF>0.001) did not explain any residual variation ( $h^2 = 0.07$ ,  $p = 0.21$ , GCTA reported  
384 results, Supplemental Table 8). We found that paternal variation may contribute a substantial  
385 fraction of residual variation ( $h^2 = 0.53$  [0.20,0.85],  $p = 0.09$ ) however this is concentrated  
386 exclusively in low frequency variants ( $0.001 < \text{MAF} < 0.01$ ,  $h^2 = 0.52$  [0.01,0.94]) rather than  
387 more common variants ( $\text{MAF} > 0.01$ ,  $h^2 = 0.008$  [0,0.38], Supplemental Table 7). This will  
388 need further investigation with larger sample sizes.

## 389 Discussion

390 Germline hypermutation is an uncommon but important phenomenon. We identified 12  
391 hypermutated individuals from over 20,000 parent offspring sequenced trios in the DDD and  
392 100kGP cohorts with a 2-7 fold increased number of dnSNVs. It is likely that there are  
393 additional, currently undetected, germline hypermutated individuals in the DDD cohort. The  
394 stringent strategy we adopted to screen this exome-sequenced cohort for potential  
395 hypermutated individuals for subsequent confirmation by genome sequencing will have  
396 missed some individuals with hypermutation of 2-7 fold.

397 In two of the 12 hypermutated individuals, the excess mutations appeared to have  
398 occurred post-zygotically, however for the majority ( $n=8$ ) of these hypermutated individuals,  
399 the excess dnSNVs phased paternally implicating the father as the source of this  
400 hypermutation. For five of these fathers, characteristic mutational signatures and clinical  
401 records of cancer treatment prior to conception strongly implicated the mutagenic influence  
402 of two different classes of chemotherapeutics: platinum-based drugs (3 families) and  
403 mustard-derived alkylating agents (2 families). We also identified likely paternal mutator  
404 variants in two hypermutated families. These were rare homozygous missense variants in

405 two known DNA repair genes: *XPC* and *MPG*. Functional and clinical data strongly  
406 supported the mutagenic nature of these variants.

407 It is well established that defects in DNA repair genes can increase somatic mutation  
408 rates and elevate cancer risk<sup>56</sup>. Our findings imply that germline mutation rates can be  
409 similarly affected. However, defects in DNA repair pathways do not always behave similarly  
410 in the soma and the germline. We interrogated PTVs in an established somatic mutator  
411 gene, *MBD4*, and found they did not have a detectable effect in the germline<sup>57</sup>. We also  
412 examined the impact of parental rare nonsynonymous variants in DNA repair genes on the  
413 number of DNMs in offspring and did not find a significant difference. To detect more subtle  
414 effects of these variants other analytical approaches will need to be explored. Paternal  
415 variants that have previously been associated with a cancer phenotype were nominally  
416 significant but having one of these variants only amounted to an estimated average increase  
417 of ~2 DNMs in the child. If only a subset of these variants have an impact in the germline this  
418 would dilute the power to detect a mutagenic effect and it is likely that both larger sample  
419 sizes and additional variant curation will be needed to investigate this further. There may  
420 also be genes and pathways that impact mutation in the germline more than the soma;  
421 uncovering the genes and associated variants in these genes will be more challenging.

422 Germline hypermutation accounted for 7% of the variance in germline mutation rate  
423 in the 100kGP rare disease cohort. The ascertainment in this cohort for rare disease in the  
424 offspring, together with the causal contribution that germline mutation plays in rare diseases,  
425 means that germline hypermutated individuals are likely enriched in this cohort relative to the  
426 general population. As a consequence, our estimate of the contribution of germline  
427 hypermutation to the variance in numbers of dnSNVs per individual is likely inflated.  
428 However, the absolute risk of a germline hypermutator having a child with a genetic disease  
429 is still low. The population average risk for having a child with a severe developmental  
430 disorder caused by a *de novo* mutation has been estimated to be 1 in 300 births<sup>11</sup> and so a  
431 4-fold increase in DNMs in a child would only elevate this absolute risk to just over 1%.  
432 Therefore, we anticipate that most germline hypermutated individuals will not have a rare  
433 genetic disease, and germline hypermutation will also be observed in healthy population  
434 cohorts.

435 The two genetic causes of germline hypermutation that we identified were both  
436 recessive in action. Similarly, most DNA repair disorders act recessively in their cellular  
437 mutagenic effects. This implies that genetic causes of germline hypermutation are likely to  
438 arise at substantially higher frequencies in populations with high rates of parental  
439 consanguinity. In such populations, the overall incidence of germline hypermutation may be  
440 higher and the proportion of the variance in the number of dnSNVs per offspring accounted  
441 for genetic effects will be higher. We anticipate that studies focused on these populations are  
442 likely to identify additional mutations that affect germline mutation rate.

443 We found that, among 7,700 100kGP families, parental age only explained ~70% of  
444 the variance in numbers of dnSNVs per offspring, which is substantially smaller than a  
445 previous estimate of 95% based on a sample of 78 families<sup>3</sup>. Repeated sampling of 78 trios  
446 from the 100kGP showed that estimates of the variance explained by parental age can vary  
447 dramatically stochastically and we regard our estimate based on two orders of magnitude  
448 more trios to be more reliable, although other differences between the studies such as  
449 measurement error and criteria for ascertainment of families might be having a subtle  
450 influence. The residual ~20% of variation in numbers of germline dnSNVs per individual  
451 remains unexplained by parental age, data quality and hypermutation. We found that rare  
452 variants in known DNA repair genes are unlikely to account for a large proportion of this  
453 unexplained variance. Heritability analyses suggested that polygenic contributions from

454 common variants (MAF>1%) are unlikely to make a substantive contribution to this variance;  
455 however, we observed some evidence that the polygenic contribution of intermediate  
456 frequency paternal variants ( $0.001 < \text{MAF} < 0.01$ ) could be more substantial although larger  
457 sample sizes are required to confirm this observation. A limitation to these heritability  
458 analyses is that we use DNMs in offspring as a proxy for individual germline mutation rates.  
459 Measuring germline mutation rates more directly by, for example, sequencing hundreds of  
460 single gametes per individual, should facilitate better powered association studies and  
461 heritability analyses.

462 Environmental exposures are also likely to contribute to germline mutation rate  
463 variation. We have observed evidence that certain chemotherapeutics can affect germline  
464 mutation rate and targeted studies on the germline mutagenic effects of different  
465 chemotherapeutics (e.g. in cancer survivor cohorts) will be crucial in understanding this  
466 further. We anticipate that these studies will identify considerable heterogeneity in the  
467 germline mutagenic effects of different chemotherapeutics, in part due to differences in the  
468 permeability of the blood-testis barrier to different agents<sup>58</sup>, as well as variation in the  
469 vulnerability to chemotherapeutic germline mutagenesis by sex and age. As so few  
470 individuals are treated for cancer prior to reproduction, chemotherapeutic exposures will not  
471 explain a large proportion of the remaining variation in germline mutation rates however  
472 chemotherapeutic mutagenesis has important implications for cancer patients who plan to  
473 have children, especially in whether they decide to store unexposed gametes for future use  
474 of assisted reproductive technologies.

475 Unexplained hypermutation and additional variance in germline mutation rate may be  
476 explained by other environmental exposures. A limitation of this study was the lack of data  
477 on non-therapeutic environmental exposures. However, and somewhat reassuringly, the  
478 relatively tight distribution of DNMs per person in 100kGP suggests that there are unlikely to  
479 be common environmental mutagen exposures in the UK (e.g. cigarette smoking) that  
480 causes a substantive (e.g. >1.5 times) fold increase in mutation rates and concomitant  
481 disease risk. The germline generally appears to be well protected from large increases in  
482 mutation rate. However, including a broader spectrum of environmental exposures in future  
483 studies would help to identify more subtle effects and may reveal gene-by-environment  
484 interactions.

485

## 486 **Acknowledgments**

487 We thank the families and their clinicians for their participation and engagement, and our  
488 colleagues who assisted in the generation and processing of data. We would like to thank  
489 Mike Stratton, Peter Campbell, Emily Mitchell, Eleanor Dunstone, Hilary Martin, Kartik  
490 Chundru, Molly Przeworski and Jan Korbel for helpful discussions and advice. This research  
491 was made possible through access to the data and findings generated by the 100,000  
492 Genomes Project. The 100,000 Genomes Project is managed by Genomics England Limited  
493 (a wholly owned company of the Department of Health and Social Care). The 100,000  
494 Genomes Project is funded by the National Institute for Health Research and NHS England.  
495 The Wellcome Trust, Cancer Research UK and the Medical Research Council have also  
496 funded research infrastructure. The 100,000 Genomes Project uses data provided by  
497 patients and collected by the National Health Service as part of their care and support. The  
498 DDD study presents independent research commissioned by the Health Innovation  
499 Challenge Fund (grant number HICF-1009-003). The full acknowledgements can be found at  
500 [www.ddduk.org/access.html](http://www.ddduk.org/access.html). This research was funded in part by the Wellcome Trust grant  
501 [206194]. For the purpose of open access, the author has applied a CC BY public copyright  
502 licence to any Author Accepted Manuscript version arising from this submission. This work

503 was supported by Health Data Research UK, which is funded by the UK Medical Research  
504 Council, Engineering and Physical Sciences Research Council, Economic and Social  
505 Research Council, Department of Health and Social Care (England), Chief Scientist Office of  
506 the Scottish Government Health and Social Care Directorates, Health and Social Care  
507 Research and Development Division (Welsh Government), Public Health Agency (Northern  
508 Ireland), British Heart Foundation and Wellcome.

509

510

511

512

513

514

515

516

## 517 Methods

518

### 519 **DNM filtering in 100,000 Genomes Project**

520 We analysed DNMs called in 13,949 parent offspring trios from 12,609 families from the rare  
521 disease programme of the 100,000 Genomes Project. The rare disease cohort includes  
522 individuals with a wide array of diseases including neurodevelopmental disorders,  
523 cardiovascular disorders, renal and urinary tract disorders, ophthalmological disorders,  
524 tumour syndromes, ciliopathies and others. These are described in more detail in previous  
525 publications<sup>59,60</sup>. The cohort was whole genome sequenced at ~35X coverage and variant  
526 calling for these families was performed via the Genomics England rare disease analysis  
527 pipeline. The details of sequencing and variant calling have been previously described<sup>60</sup>.  
528 DNMs were called by the Genomics England Bioinformatics team using the Platypus variant  
529 caller<sup>61</sup>. These were selected to optimise various properties including the number of DNMs  
530 per person being approximately what we would expect, the distribution of the VAF of the  
531 DNMs to be centered around 0.5 and the true positive rate of DNMs to be sufficiently high as  
532 calculated from examining IGV plots. The filters applied were as follows:

- 533 ● Genotype is heterozygous in child (1/0) and homozygous in both parents (0/0)
- 534 ● Child RD >20, Mother RD>20, Father RD>20
- 535 ● Remove variants with >1 alternative read in either parent
- 536 ● VAF>0.3 and VAF<0.7 for child
- 537 ● Remove SNVs within 20 bp of each other. While this is likely removing true MNVs,  
538 the error mode was very high for clustered mutations.
- 539 ● Removed DNMs if child RD >98<sup>13</sup>
- 540 ● Removed DNMs that fell within known segmental duplication regions as defined by  
541 UCSC ([http://humanparalogy.gs.washington.edu/build37/data/  
542 GRCh37GenomicSuperDup.tab](http://humanparalogy.gs.washington.edu/build37/data/GRCh37GenomicSuperDup.tab))
- 543 ● Removed DNMs that fell in highly repetitive regions  
544 ([http://humanparalogy.gs.washington.edu/  
545 build37/data/GRCh37simpleRepeat.txt](http://humanparalogy.gs.washington.edu/build37/data/GRCh37simpleRepeat.txt))
- 546 ● For DNM calls that fell on the X chromosome these slightly modified filters were  
547 used:
  - 548 ○ For DNMs that fell in PAR regions, the filters were unchanged from the  
549 autosomal calls apart from allowing for both heterozygous (1/0) and  
550 hemizygous (1) calls in males
  - 551 ○ For DNMs that fell in non-PAR regions the following filters were used:
    - 552 ■ For males: RD>20 in child, RD>20 in mother, no RD filter on father
    - 553 ■ For males: the genotype must be hemizygous (1) in child and  
554 homozygous in mother (0/0)
    - 555 ■ For females: RD>20 in child, RD>20 in mother, RD>10 in father
    - 556

### 557 **DNM filtering and identifying hypermutated individuals in DDD**

558 To identify hypermutated individuals in the DDD study we started with exome sequencing  
559 data from the DDD study of families with a child with a severe, undiagnosed developmental  
560 disorder. The recruitment of these families has been described previously<sup>62</sup>: families were  
561 recruited at 24 clinical genetics centers within the UK National Health Service and the  
562 Republic of Ireland. Families gave informed consent to participate, and the study was

563 approved by the UK Research Ethics Committee (10/H0305/83, granted by the Cambridge  
564 South Research Ethics Committee, and GEN/284/12, granted by the Republic of Ireland  
565 Research Ethics Committee). Sequence alignment and variant calling of SNV and  
566 insertions/deletions were conducted as previously described. De novo mutations were called  
567 using DeNovoGear and filtered as previously<sup>63,11</sup>. The analysis in this paper was conducted  
568 on a subset (7,930 parent offspring trios) of the full current cohort which was not available at  
569 the start of this research.

570  
571 In the DDD study, we identified 9 individuals out of 7,930 parent-offspring trios with an  
572 increased number of exome DNMs after accounting for parental age (7-17 exome DNMs  
573 compared to an expected number of ~2). These were subsequently submitted along with  
574 their parents for PCR-free whole-genome sequencing at >30x mean coverage using  
575 Illumina 150bp paired end reads and in house WSI sequencing pipelines. Reads were  
576 mapped with bwa (v0.7.15)<sup>64</sup>. DNMs were called from these trios using DeNovoGear<sup>63</sup> and  
577 were filtered as follows:

- 578 • Read depth (RD) of child > 10, mother RD > 10, father RD > 10
- 579 • Alternative allele read depth in child >2
- 580 • Filtered on strand bias across parents and child (p-value >0.001, Fisher's exact test)
- 581 • Removed DNMs that fell within known segmental duplication regions as defined by
- 582 • UCSC ([http://humanparalogy.gs.washington.edu/build37/data/](http://humanparalogy.gs.washington.edu/build37/data/GRCh37GenomicSuperDup.tab)
- 583 [GRCh37GenomicSuperDup.tab](http://humanparalogy.gs.washington.edu/build37/data/GRCh37GenomicSuperDup.tab))
- 584 • Removed DNMs that fell in highly repetitive regions
- 585 (<http://humanparalogy.gs.washington.edu/build37/data/GRCh37simpleRepeat.txt>)
- 586 • Allele frequency in gnomAD < 0.01
- 587 • VAF <0.1 for both parents
- 588 • Removed mutations if both parents have >1 read supporting the alternative allele
- 589 • Test to see if VAF in child is significantly greater than the error rate at that site as
- 590 defined by error sites estimated using Shearwater<sup>65</sup>.
- 591 • Posterior probability from DeNovoGear > 0.00781<sup>63,11</sup>
- 592 • Removed DNMs if child RD >200.

593 After applying these filters, this resulted in 1,367 DNMs. All of these DNMs were inspected in  
594 the Integrative Genome Viewer<sup>66</sup> and removed if they appeared to be false positives. This  
595 resulted in a final set of 916 DNMs across the 9 trios. One of the 9 had 277 dnSNVs genome  
596 wide while the remaining had expected numbers (median number of 81 dnSNVs).

597

### 598 **Parental phasing of *de novo* mutations**

599 To phase the DNMs in both 100kGP and DDD we used a custom script which used the  
600 following read-based approach to phase a DNM. This first searches for heterozygous  
601 variants within 500 bp of the DNM that was able to be phased to a parent (so not  
602 heterozygous in both parents and offspring). We then examined the reads or read pairs  
603 which included both the variant and the DNM and counted how many times we observed the  
604 DNM on the same haplotype of each parent. If the DNM appears exclusively on the same  
605 haplotype as a single parent then that was determined to originate from that parent. We  
606 discarded DNMs that had conflicting evidence from both parents. This code is available on  
607 GitHub (<https://github.com/queenjobo/PhaseMyDeNovo>).

608

### 609 **Analysis of effect of parental age on germline mutation rate**

610 To assess the effect of parental age on germline mutation rate we ran the following  
611 regressions on autosomal DNMs. On all (unphased) DNMs we ran two separate regressions

612 for SNVs and indels. We chose a negative Binomial generalized linear model here as the  
613 Poisson was found to be overdispersed. We fitted the following model using a negative  
614 Binomial GLM with an identity link where  $Y$  is the number of DNMs for an individual:

615

$$616 \quad E(Y) = \beta_0 + \beta_1 \text{paternal\_age} + \beta_2 \text{maternal\_age}$$

617

618 For the phased DNMs we fit the following two models using a negative Binomial GLM with  
619 an identity link where  $Y_{\text{maternal}}$  is the number of maternally derived DNMs and  $Y_{\text{paternal}}$  is the  
620 number of paternally derived DNMs:

621

$$622 \quad E(Y_{\text{paternal}}) = \beta_0 + \beta_1 \text{paternal\_age}$$

623

$$624 \quad E(Y_{\text{maternal}}) = \beta_0 + \beta_1 \text{maternal\_age}$$

625

626

### 626 **Identifying hypermutated individuals in 100kGP**

627 To identify hypermutated individuals in the 100kGP cohort we first wanted to regress out the  
628 effect of parental age as described in the parental age analysis. We then looked at the  
629 distribution of the studentized residuals and then, assuming these followed a  $t$  distribution  
630 with  $N-3$  degrees of freedom, calculated a t-test p-value for each individual. We took the  
631 same approach for the number of indels, except in this case  $Y$  would be the number of de  
632 novo indels.

633

634 We identified 21 individuals out of 12,471 parent-offspring trios with significantly increased  
635 number of dnSNVs genome wide ( $p < 0.05/12471$ ). We performed multiple quality control  
636 analyses which included examining the mutations in the Integrative Genomics Browser for  
637 these individuals to examine DNM calling accuracy, looking at the relative position of the  
638 DNMs across the genome and examining the mutational spectra of the DNMs to identify any  
639 well known sequencing error mutation types. We identified 12 that were not truly  
640 hypermutated. The majority of false positives (10) were due to a parental somatic deletion in  
641 blood increasing the number of apparent DNMs (Supplemental Figure 14). These individuals  
642 had some of the highest number of DNMs called (up to 1379 DNMs per individual). For each  
643 of these 10 individuals, the DNM calls all clustered to a specific region in a single  
644 chromosome. In this same corresponding region in the parent, we observed a loss of  
645 heterozygosity when calculating the heterozygous/homozygous ratio. In addition, many of  
646 these calls appeared to be low level mosaic in that same parent. This type of event has  
647 previously been shown to create artifacts in CNV calls and is referred to as a 'Loss of  
648 Transmitted Allele' event<sup>67</sup>. The remaining 2 false positives were due to bad data quality in  
649 either the offspring or one of the parents leading to poor DNM calls. The large number of  
650 DNMs in these false positive individuals also led to significant underdispersion in the model  
651 so after removing these 12 individuals we reran the regression model and subsequently  
652 identified 11 individuals which appeared truly hypermutated ( $p < 0.05/12,459$ ).

653

### 654 **Extraction of mutational signatures**

655 Mutational signatures were extracted from maternally and paternally phased autosomal  
656 DNMs, 24 controls (randomly selected), 25 individuals (father with a cancer diagnosis prior  
657 to conception), 27 individuals (mother with a cancer diagnosis prior to conception) and 12  
658 hypermutated individuals that we identified. All DNMs were lifted over to GRCh37 prior to  
659 signature extraction (100kGP samples are a mix of GRCh37 and GRCh38) and through the  
660 liftover process a small number of 100kGP DNMs were lost (0.09% overall, 2 DNMs lost



661 across all hypermutated individuals). The mutation counts for all the samples can be found  
662 in Supplemental Table 1. This was done using SigProfiler (v1.0.17) and these signatures are  
663 extracted and subsequently mapped on to COSMIC mutational signatures (COSMIC v91,  
664 Mutational Signature v3.1)<sup>19,40</sup>. SigProfiler defaults to selecting a solution with higher  
665 specificity than sensitivity. A solution with 4 de-novo signatures was chosen as optimal by  
666 SigProfiler for the 12 hypermutator samples. Another stable solution with five de-novo  
667 signatures was also manually deconvoluted, which has been considered as the final  
668 solution. The mutation probability for mutational signature SBSHYP can be found in  
669 Supplemental Table 2.

670

### 671 **Signature comparison to external exposures**

672 We compared the extracted signatures from these hypermutated individuals to a compilation  
673 of previously identified signatures caused by environmental mutagens from the literature. The  
674 environmental signatures were compiled from Kucab et al (Cell 2019)<sup>24</sup>, Pich et al (Nautre  
675 Genetics 2019)<sup>51</sup> and Volkova et al (Nature Communications 2020)<sup>52</sup>. Comparison was  
676 calculated as the cosine similarity between the different signatures.

677

### 678 **Defining set of genes involved in DNA repair**

679 We compiled a list of DNA repair genes which were taken from an updated version of the  
680 table in Lange et al, Nature Reviews Cancer 2011  
681 ([https://www.mdanderson.org/documents/Labs/Wood-Laboratory/human-dna-repair-](https://www.mdanderson.org/documents/Labs/Wood-Laboratory/human-dna-repair-genes.html)  
682 [genes.html](https://www.mdanderson.org/documents/Labs/Wood-Laboratory/human-dna-repair-genes.html))<sup>68</sup>. These can be found in Supplemental Table 3. These are annotated with the  
683 pathways they are involved with (eg. nucleotide-excision repair, mismatch repair ). A 'rare'  
684 variant is defined as those with an allele frequency of <0.001 for heterozygous variants and  
685 those with an allele frequency of <0.01 for homozygous variants in both 1000 Genomes as  
686 well as across the 100kGP cohort.

687

### 688 **Kinetic characterization of MPG**

689 The A135T variant of MPG was generated by site-directed mutagenesis and confirmed by  
690 sequencing both strands. The catalytic domain of WT and A135T MPG were expressed in  
691 BL21(DE3) Rosetta2 *E. coli* and purified as described for the full-length protein<sup>69</sup>. Protein  
692 concentration was determined by absorbance at 280 nm. Active concentration was  
693 determined by electrophoretic mobility shift assay with 5'-FAM-labeled pyrolydine-DNA  
694 (Supplemental Figure 8)<sup>48</sup>. Glycosylase assays were performed with 50 mM NaMOPS, pH  
695 7.3, 172 mM potassium acetate, 1 mM DTT, 1 mM EDTA, 0.1 mg/mL BSA at 37 °C. For  
696 single turnover glycosylase activity, a 5'-FAM-labeled duplex was annealed by heating to 95  
697 °C and slowly cooling to 4 °C (see Supplemental Figure 9). DNA substrate concentration  
698 was varied between 10 and 50 nM and MPG concentration was maintained in at least 2-fold  
699 excess over DNA from 25 to 10,000 nM. Timepoints were quenched in 0.2 M NaOH, heated  
700 to 70 °C for 12.5 min, then mixed with formamide/EDTA loading buffer and analyzed by 15%  
701 denaturing polyacrylamide gel electrophoresis. Fluorescence was quantified with a Typhoon  
702 5 imager and ImageQuant software (GE). The fraction of product was fit by a single  
703 exponential equation to determine the observed single turnover rate constant ( $k_{obs}$ ). For Hx  
704 excision, the concentration dependence was fit by the equation  $k_{obs} = k_{max} [E]/(K_{1/2}+[E])$ , in  
705 which the  $K_{1/2}$  is the concentration at which half the maximal rate constant ( $k_{max}$ ) was  
706 obtained and [E] is the concentration of enzyme. It was not possible to measure the  $K_{1/2}$  for  
707  $\epsilon$ A excision using a fluorescence-based assay due to extremely tight binding<sup>70</sup>. Multiple  
708 turnover glycosylase assays were performed with 5 nM MPG and 10–40-fold excess of  
709 substrate (Supplemental Figure 9).

710

## 711 **Estimating the fraction of variance explained**

712 To estimate the fraction of germline mutation variance explained by several factors, we fit  
713 the

714 following negative Binomial GLMs with an identity link. Data quality is likely to correlate with  
715 the number of DNMs detected so to reduce this variation we used a subset of the 100kGP  
716 dataset which had been filtered on some base quality control (QC) metrics by the  
717 Bioinformatics team at GEL:

- 718 • cross-contamination < 5%
- 719 • mapping rate > 75%
- 720 • mean sample coverage > 20
- 721 • insert size <250

722 We then included the following variables to try and capture as much of the residual  
723 measurement error which may also be impacting DNM calling. In brackets are the  
724 corresponding variable names used in the models below:

- 725 • Mean coverage for the child, mother and father (*child\_mean\_RD*, *mother\_mean\_RD*,  
726 *father\_mean\_RD*)
- 727 • Proportion of aligned reads for the child, mother and father (*child\_prop\_aligned*,  
728 *mother\_prop\_aligned*, *father\_prop\_aligned*)
- 729 • Number of SNVs called for child, mother and father (*child\_snvs*, *mother\_snvs*,  
730 *father\_snvs*)
- 731 • Median VAF of DNMs called in child (*median\_VAF*)
- 732 • Median 'Bayes Factor' as outputted by Platypus for DNMs called in the child. This is  
733 a metric of DNM quality (*median\_BF*).

734

735 The first model only included parental age:

736

$$737 E(Y) = \beta_0 + \beta_1 \textit{paternal\_age} + \beta_2 \textit{maternal\_age}$$

738

739 The second model also included data quality variables as described above:

740

$$741 E(Y) = \beta_0 + \beta_1 \textit{paternal\_age} + \beta_2 \textit{maternal\_age} + \beta_3 \textit{child\_mean\_RD}$$
$$742 + \beta_4 \textit{mother\_mean\_RD} + \beta_5 \textit{father\_mean\_RD} + \beta_6 \textit{child\_prop\_aligned}$$
$$743 + \beta_7 \textit{mother\_prop\_aligned} + \beta_8 \textit{father\_prop\_aligned} + \beta_9 \textit{child\_snvs}$$
$$744 + \beta_{10} \textit{mother\_snvs} + \beta_{11} \textit{father\_snvs} + \beta_{12} \textit{median\_VAF} + \beta_{13} \textit{median\_BF}$$

745

746

747 The third model included a variable for excess mutations in the 11 confirmed hypermutated  
748 individuals (*hm\_excess*) in the 100kGP dataset. This variable was the total number of  
749 mutations subtracted by the median number of DNMs in the cohort (65),  $Y_{\text{hypermutated}} -$   
750  $\text{median}(Y)$  for these 11 individuals and 0 for all other individuals.

751

$$752 E(Y) = \beta_0 + \beta_1 \textit{paternal\_age} + \beta_2 \textit{maternal\_age} + \beta_3 \textit{child\_mean\_RD}$$
$$753 + \beta_4 \textit{mother\_mean\_RD} + \beta_5 \textit{father\_mean\_RD} + \beta_6 \textit{child\_prop\_aligned}$$
$$754 + \beta_7 \textit{mother\_prop\_aligned} + \beta_8 \textit{father\_prop\_aligned} + \beta_9 \textit{child\_snvs}$$
$$755 + \beta_{10} \textit{mother\_snvs} + \beta_{11} \textit{father\_snvs} + \beta_{12} \textit{median\_VAF} + \beta_{13} \textit{median\_BF}$$
$$756 + \beta_{14} \textit{hm\_excess}$$

757

758 The fraction of variance ( $F$ ) explained after accounting for Poisson variance in the mutation  
759 rate was calculated in a similar way to Kong et al using the following formula<sup>3</sup>.

760 
$$F = pseudoR^2 \frac{1 - \underline{Y}}{Var(Y)}$$

761

762 McFadden's pseudo  $R^2$  was used here as a Negative binomial GLM was fitted. We repeated  
763 these analyses fitting an ordinary least squares regression, as was done in Kong et al<sup>3</sup>,  
764 using the  $R^2$  and got comparable results. To calculate a 95% confidence interval we used a  
765 bootstrapping approach. We sampled with replacement 1,000 times and extracted the 2.5%  
766 and 97.5% percentiles.

767

### 768 **Analysis of contribution of rare variants in DNA repair genes**

769 We fit 8 separate regressions to assess the contribution of rare variants in DNA repair genes  
770 (compiled as described previously). These were across three different sets of genes:  
771 variants in all DNA repair genes, variants in a subset of DNA repair genes known to be  
772 associated with BER, MMR, NER or a DNA polymerase and variants within this subset that  
773 have also been associated with a cancer phenotype. For this we downloaded all ClinVar  
774 entries as of October 2019 and searched for germline 'pathogenic' or 'likely pathogenic'  
775 variants annotated with cancer<sup>54</sup>. We tested both all nonsynonymous variants and just  
776 protein truncating variants (PTVs) for each set. To assess the contribution of each of these  
777 sets we created two binary variables per set indicating a presence or absence of a maternal  
778 or paternal variant for each individual and then ran a negative binomial regression for each  
779 subset including these as independent variables along with hypermutation status, parental  
780 age and QC metrics as described in the previous section.

781

### 782 **Simulations to explore effect estimates of fraction of variance explained by paternal 783 age from downsampling**

784 To explore how the estimates of the fraction of variance of the number of DNMs is explained  
785 by paternal age varies with downsampling we first simulated a random sample as follows  
786 10,000 times:

- 787
  - Randomly sample 78 trios (the number of trios in Kong et al.<sup>3</sup>.)
  - Fit OLS of  $E(Y) = \beta_0 + \beta_1 paternal\_age$
  - Estimated fraction of variance ( $F$ ) as described in Kong et al<sup>3</sup>.

790 We found that the median fraction explained was 0.77, sd of 0.13 and with 95% of  
791 simulations fallings between 0.51 and 1.00.

792

### 793 **Identifying parents with cancer diagnosis prior to birth of offspring**

794 To identify parents who had received a cancer diagnosis prior to the conception of their child  
795 we examined the admitted patient care hospital episode statistics of these parents. There  
796 were no hospital episode statistics available prior to 1997 and many individuals did not have  
797 any records until after the birth of the child. To ensure comparisons were not biased by this  
798 we first subsetted to parents who had at least one episode statistic recorded at least two  
799 years prior to the child's year of birth. Two years prior to the child's birth was our best  
800 approximation for prior to conception without the exact child date of birth. This resulted in  
801 2,891 fathers and 5,508 mothers. From this set we then extracted all entries with ICD10  
802 codes with a "C" prefix which corresponds to malignant neoplasms and "Z85" which  
803 corresponds to a personal history of malignant neoplasm. We defined a parent as having a  
804 cancer diagnosis prior to conception if they had any of these codes recorded  $\geq 2$  years prior

805 to the child's year of birth. We also extracted all entries with ICD10 code "Z511" which codes  
806 for an 'encounter for antineoplastic chemotherapy and immunotherapy'.

807 Two fathers of hypermutated individuals who we suspect had chemotherapy prior to  
808 conception did not meet these criteria as the father of GEL\_5 received chemotherapy for  
809 treatment for SLE and not cancer and for the father of GEL\_8 the hospital record 'personal  
810 history of malignant neoplasm' were entered after the conception of the child (Supplemental  
811 Table 4).

812 To compare the number of dnSNVs between the group of individuals with parents with and  
813 without cancer diagnoses we used a Wilcoxon test on the residuals from the negative  
814 binomial regression on dnSNVs correcting for parental age, hypermutation status and data  
815 quality. To look at the effect of maternal cancer on dnSNVs we matched these individuals on  
816 maternal and paternal age with sampling replacement with 20 controls for each of the 27  
817 individuals. We found a significant increase in DNMs (74 compared to 65 median dnSNVs,  $p$   
818 = 0.001, Wilcoxon Test).

819

### 820 **SNP heritability analysis**

821 For this analysis we started with the same subset of the 100kGP dataset that had been  
822 filtered as described in the analysis on the impact of rare variants in DNA repair genes  
823 across the cohort (see above). To ensure variant quality we subsetted to variants that have  
824 been observed in genomes from gnomAD (v3)<sup>71</sup>. These were then filtered by ancestry to  
825 parent-offspring trios where both the parents and child mapped on to the 1000 Genomes  
826 GBR subpopulations. The first 10 principal components were subsequently included in the  
827 heritability analyses. To remove cryptic relatedness we removed individuals with estimated  
828 relatedness >0.025 (using GCTA `grm-cutoff` 0.025). This resulted in a set of 6,352 fathers  
829 and 6,329 mothers. The phenotype in this analysis was defined as the residual from the  
830 negative binomial regression of the number of DNMs after accounting for parental age,  
831 hypermutation status and several data quality variables as described when estimating the  
832 fraction of DNM count variation explained (see Methods above). To estimate heritability we  
833 ran GCTA's GREML-LDMS on two LD stratifications and three MAF bins (0.001-0.01, 0.01-  
834 0.05, 0.05-1).<sup>55</sup> For mothers this was run with the `--reml-no-constrain` option because  
835 otherwise it would not converge. (Supplemental Table 8)

836

837

838 1. Conrad, D. F. *et al.* Variation in genome-wide mutation rates within and between human  
839 families. *Nat. Genet.* **43**, 712–714 (2011).

840 2. Roach, J. C. *et al.* Analysis of Genetic Inheritance in a Family Quartet by Whole-  
841 Genome Sequencing. *Science* vol. 328 636–639 (2010).

842 3. Kong, A. *et al.* Rate of de novo mutations and the importance of father's age to disease  
843 risk. *Nature* **488**, 471–475 (2012).

844 4. Sasani, T. A. *et al.* Large, three-generation human families reveal post-zygotic  
845 mosaicism and variability in germline mutation accumulation. *Elife* **8**, (2019).

846 5. Lindsay, S. J., Rahbari, R., Kaplanis, J., Keane, T. & Hurles, M. E. Similarities and  
847 differences in patterns of germline mutation between mice and humans. *Nat. Commun.*  
848 **10**, 4053 (2019).

849 6. Harris, K. Evidence for recent, population-specific evolution of the human mutation rate.  
850 *Proceedings of the National Academy of Sciences* vol. 112 3439–3444 (2015).

851 7. Yang, S. *et al.* Parent–progeny sequencing indicates higher mutation rates in  
852 heterozygotes. *Nature* vol. 523 463–467 (2015).

853 8. Amos, W. Flanking heterozygosity influences the relative probability of different base  
854 substitutions in humans. *R Soc Open Sci* **6**, 191018 (2019).

855 9. Girard, S. L. *et al.* Paternal Age Explains a Major Portion of De Novo Germline Mutation  
856 Rate Variability in Healthy Individuals. *PLOS ONE* vol. 11 e0164212 (2016).

857 10. Mitra, I. *et al.* Genome-wide patterns of de novo tandem repeat mutations and their  
858 contribution to autism spectrum disorders. doi:10.1101/2020.03.04.974170.

859 11. Study, Deciphering Developmental Disorders. Prevalence and Architecture of De Novo  
860 Mutations in Developmental Disorders. *Nature* vol. 542 433–438 (2017).

861 12. Goldmann, J. M. *et al.* Parent-of-origin-specific signatures of de novo mutations. *Nat.*  
862 *Genet.* **48**, 935–939 (2016).

863 13. Rahbari, R. *et al.* Timing, rates and spectra of human germline mutation. *Nat. Genet.*  
864 **48**, 126–133 (2016).

- 865 14. Gao, Z. *et al.* Overlooked roles of DNA damage and maternal age in generating human  
866 germline mutations. *Proc. Natl. Acad. Sci. U. S. A.* **116**, 9491–9500 (2019).
- 867 15. Jónsson, H. *et al.* Parental influence on human germline de novo mutations in 1,548  
868 trios from Iceland. *Nature* **549**, 519–522 (2017).
- 869 16. Alexandrov, L. B., Nik-Zainal, S., Wedge, D. C., Campbell, P. J. & Stratton, M. R.  
870 Deciphering Signatures of Mutational Processes Operative in Human Cancer. *Cell*  
871 *Reports* vol. 3 246–259 (2013).
- 872 17. Nik-Zainal, S. *et al.* 604 Cancer Genomics, Epigenetics and Genomic Instability.  
873 Mutational Processes Shaping the Genomes of Twenty-one Breast Cancers. *European*  
874 *Journal of Cancer* vol. 48 S144 (2012).
- 875 18. Phillips, D. H. Mutational spectra and mutational signatures: Insights into cancer  
876 aetiology and mechanisms of DNA damage and repair. *DNA Repair* **71**, 6–11 (2018).
- 877 19. Alexandrov, L. B. *et al.* The repertoire of mutational signatures in human cancer. *Nature*  
878 **578**, 94–101 (2020).
- 879 20. Demanelis, K. *et al.* Determinants of telomere length across human tissues. *Science*  
880 **369**, (2020).
- 881 21. Moore, L., Cagan, A., Coorens, T., Neville, M. D. C. & Sanghvi, R. The mutational  
882 landscape of human somatic and germline cells. *bioRxiv* (2020).
- 883 22. Alexandrov, L. B. *et al.* Clock-like mutational processes in human somatic cells. *Nat.*  
884 *Genet.* **47**, 1402–1407 (2015).
- 885 23. Stratton, M. R., Campbell, P. J. & Andrew Futreal, P. The cancer genome. *Nature* vol.  
886 458 719–724 (2009).
- 887 24. Kucab, J. E. *et al.* A Compendium of Mutational Signatures of Environmental Agents.  
888 *Cell* **177**, 821–836.e16 (2019).
- 889 25. Tawn, E. J. & Janet Tawn, E. Hereditary Effects of Radiation: UNSCEAR 2001 Report  
890 to the General Assembly, with Scientific Annex. *Journal of Radiological Protection* vol.  
891 22 121–122 (2002).
- 892 26. Forster, L., Forster, P., Lutz-Bonengel, S., Willkomm, H. & Brinkmann, B. Natural

- 893 radioactivity and human mitochondrial DNA mutations. *Proc. Natl. Acad. Sci. U. S. A.*  
894 **99**, 13950–13954 (2002).
- 895 27. Adewoye, A. B., Lindsay, S. J., Dubrova, Y. E. & Hurles, M. E. The genome-wide effects  
896 of ionizing radiation on mutation induction in the mammalian germline. *Nat. Commun.* **6**,  
897 6684 (2015).
- 898 28. Huang, K.-L. *et al.* Pathogenic Germline Variants in 10,389 Adult Cancers. *Cell* **173**,  
899 355–370.e14 (2018).
- 900 29. Dutil, J. *et al.* Germline variants in cancer genes in high-risk non-BRCA patients from  
901 Puerto Rico. *Sci. Rep.* **9**, 17769 (2019).
- 902 30. Hu, C. *et al.* Association Between Inherited Germline Mutations in Cancer  
903 Predisposition Genes and Risk of Pancreatic Cancer. *JAMA* vol. 319 2401 (2018).
- 904 31. Huang, Q.-Y. *et al.* Mutation patterns at dinucleotide microsatellite loci in humans. *Am.*  
905 *J. Hum. Genet.* **70**, 625–634 (2002).
- 906 32. Gymrek, M., Willems, T., Reich, D. & Erlich, Y. Interpreting short tandem repeat  
907 variations in humans using mutational constraint. *Nat. Genet.* **49**, 1495–1501 (2017).
- 908 33. Sun, J. X. *et al.* A direct characterization of human mutation based on microsatellites.  
909 *Nature Genetics* vol. 44 1161–1165 (2012).
- 910 34. Monckton, D. G. *et al.* Minisatellite mutation rate variation associated with a flanking  
911 DNA sequence polymorphism. *Nat. Genet.* **8**, 162–170 (1994).
- 912 35. Crowley, J. J. *et al.* Common-variant associations with fragile X syndrome. *Mol.*  
913 *Psychiatry* **24**, 338–344 (2019).
- 914 36. Kaplanis, J. *et al.* Evidence for 28 genetic disorders discovered by combining healthcare  
915 and research data. *Nature* **586**, 757–762 (2020).
- 916 37. Uchimura, A. *et al.* Germline mutation rates and the long-term phenotypic effects of  
917 mutation accumulation in wild-type laboratory mice and mutator mice. *Genome Res.* **25**,  
918 1125–1134 (2015).
- 919 38. Cawthon, R. M. *et al.* Germline mutation rates in young adults predict longevity and  
920 reproductive lifespan. *Sci. Rep.* **10**, 10001 (2020).

- 921 39. Liu, P. *et al.* An Organismal CNV Mutator Phenotype Restricted to Early Human  
922 Development. *Cell* **168**, 830–842.e7 (2017).
- 923 40. Tate, J. G. *et al.* COSMIC: the Catalogue Of Somatic Mutations In Cancer. *Nucleic*  
924 *Acids Res.* **47**, D941–D947 (2019).
- 925 41. Lehmann, A. R., McGibbon, D. & Stefanini, M. Xeroderma pigmentosum. *Orphanet J.*  
926 *Rare Dis.* **6**, 70 (2011).
- 927 42. Pippard, E. C., Hall, A. J., Barker, D. J. & Bridges, B. A. Cancer in homozygotes and  
928 heterozygotes of ataxia-telangiectasia and xeroderma pigmentosum in Britain. *Cancer*  
929 *Res.* **48**, 2929–2932 (1988).
- 930 43. Jager, M. *et al.* Deficiency of nucleotide excision repair is associated with mutational  
931 signature observed in cancer. *Genome Res.* **29**, 1067–1077 (2019).
- 932 44. Miccoli, L. *et al.* The combined effects of xeroderma pigmentosum C deficiency and  
933 mutagens on mutation rates in the mouse germ line. *Cancer Res.* **67**, 4695–4699  
934 (2007).
- 935 45. Laskowski, R. A., Stephenson, J. D., Sillitoe, I., Orengo, C. A. & Thornton, J. M. VarSite:  
936 Disease variants and protein structure. *Protein Sci.* **29**, 111–119 (2020).
- 937 46. Rentzsch, P., Witten, D., Cooper, G. M., Shendure, J. & Kircher, M. CADD: predicting  
938 the deleteriousness of variants throughout the human genome. *Nucleic Acids Res.* **47**,  
939 D886–D894 (2019).
- 940 47. Glassner, B. J., Rasmussen, L. J., Najarian, M. T., Posnick, L. M. & Samson, L. D.  
941 Generation of a strong mutator phenotype in yeast by imbalanced base excision repair.  
942 *Proc. Natl. Acad. Sci. U. S. A.* **95**, 9997–10002 (1998).
- 943 48. Eyler, D. E., Burnham, K. A., Wilson, T. E. & O'Brien, P. J. Mechanisms of glycosylase  
944 induced genomic instability. *PLoS One* **12**, e0174041 (2017).
- 945 49. Connor, E. E., Wilson, J. J. & Wyatt, M. D. Effects of substrate specificity on initiating  
946 the base excision repair of N-methylpurines by variant human 3-methyladenine DNA  
947 glycosylases. *Chem. Res. Toxicol.* **18**, 87–94 (2005).
- 948 50. Boot, A. *et al.* In-depth characterization of the cisplatin mutational signature in human



- 949 cell lines and in esophageal and liver tumors. *Genome Res.* **28**, 654–665 (2018).
- 950 51. Pich, O. *et al.* The mutational footprints of cancer therapies. *Nat. Genet.* **51**, 1732–1740  
951 (2019).
- 952 52. Volkova, N. V. *et al.* Mutational signatures are jointly shaped by DNA damage and  
953 repair. *Nat. Commun.* **11**, 2169 (2020).
- 954 53. Hock, H. & Shimamura, A. ETV6 in hematopoiesis and leukemia predisposition. *Semin.*  
955 *Hematol.* **54**, 98–104 (2017).
- 956 54. Landrum, M. J. *et al.* ClinVar: public archive of interpretations of clinically relevant  
957 variants. *Nucleic Acids Res.* **44**, D862–8 (2016).
- 958 55. Yang, J. *et al.* Genetic variance estimation with imputed variants finds negligible missing  
959 heritability for human height and body mass index. *Nat. Genet.* **47**, 1114–1120 (2015).
- 960 56. Kilpivaara, O. & Aaltonen, L. A. Diagnostic cancer genome sequencing and the  
961 contribution of germline variants. *Science* **339**, 1559–1562 (2013).
- 962 57. Wong, E. *et al.* Mbd4 inactivation increases C->T transition mutations and promotes  
963 gastrointestinal tumor formation. *Proceedings of the National Academy of Sciences* vol.  
964 99 14937–14942 (2002).
- 965 58. Bart, J. *et al.* An oncological view on the blood-testis barrier. *Lancet Oncol.* **3**, 357–363  
966 (2002).
- 967 59. Wheway, G., Mitchison, H. M. & Genomics England Research Consortium.  
968 Opportunities and Challenges for Molecular Understanding of Ciliopathies-The 100,000  
969 Genomes Project. *Front. Genet.* **10**, 127 (2019).
- 970 60. Ouwehand, W. H., on behalf of the NIHR BioResource and the & 000 Genomes Project.  
971 Whole-genome sequencing of rare disease patients in a national healthcare system.  
972 doi:10.1101/507244.
- 973 61. Rimmer, A. *et al.* Integrating mapping-, assembly- and haplotype-based approaches for  
974 calling variants in clinical sequencing applications. *Nat. Genet.* **46**, 912–918 (2014).
- 975 62. Wright, C. F. *et al.* Genetic diagnosis of developmental disorders in the DDD study: a  
976 scalable analysis of genome-wide research data. *Lancet* **385**, 1305–1314 (2015).

- 977 63. Ramu, A. *et al.* DeNovoGear: de novo indel and point mutation discovery and phasing.  
978 *Nat. Methods* **10**, 985–987 (2013).
- 979 64. Li, H. & Durbin, R. Fast and accurate short read alignment with Burrows-Wheeler  
980 transform. *Bioinformatics* **25**, 1754–1760 (2009).
- 981 65. Gerstung, M., Papaemmanuil, E. & Campbell, P. J. Subclonal variant calling with  
982 multiple samples and prior knowledge. *Bioinformatics* **30**, 1198–1204 (2014).
- 983 66. Thorvaldsdottir, H., Robinson, J. T. & Mesirov, J. P. Integrative Genomics Viewer (IGV):  
984 high-performance genomics data visualization and exploration. *Briefings in*  
985 *Bioinformatics* vol. 14 178–192 (2013).
- 986 67. Redon, R. *et al.* Global variation in copy number in the human genome. *Nature* **444**,  
987 444–454 (2006).
- 988 68. Lange, S. S., Takata, K.-I. & Wood, R. D. DNA polymerases and cancer. *Nat. Rev.*  
989 *Cancer* **11**, 96–110 (2011).
- 990 69. Zhang, Y. & O'Brien, P. J. Repair of Alkylation Damage in Eukaryotic Chromatin  
991 Depends on Searching Ability of Alkyladenine DNA Glycosylase. *ACS Chem. Biol.* **10**,  
992 2606–2615 (2015).
- 993 70. Wolfe, A. E. & O'Brien, P. J. Kinetic mechanism for the flipping and excision of 1,N(6)-  
994 ethenoadenine by human alkyladenine DNA glycosylase. *Biochemistry* **48**, 11357–  
995 11369 (2009).
- 996 71. Karczewski, K. J. *et al.* The mutational constraint spectrum quantified from variation in  
997 141,456 humans. *Nature* **581**, 434–443 (2020).
- 998
